# Supplementary material for: Mitochondrial and Y-chromosomal profile of the Kazakh population from East Kazakhstan
Source: PubMed Central journal article supplement (PMC3583390; doi:10.3325/cmj.2013.54.17), 2013-02
Supplement: CroatMedJ_54_s003.pdf [file CroatMedJ_54_s003.pdf]

**Supplementary table 1.** Characteristics of mtDNA studies in Eurasian populations

| <b>Population</b> | <b>n*</b> | <b>Location</b>   | <b>Reference No.</b> |
|-------------------|-----------|-------------------|----------------------|
| Altaiian Kazakhs  | 237       | Altai Republic    | 6                    |
| Altaiians         | 110       | Altai Republic    | 7                    |
| Buryats           | 91        | South Siberia     | 7                    |
| Chukchi           | 66        | Siberia           | 8                    |
| Evenki            | 71        | Siberia           | 9                    |
| Gilaki            | 37        | Northern Iran     | 10                   |
| Itelmen           | 47        | Siberia           | 11                   |
| Kazakhs1          | 55        | South Kazakhstan  | 1                    |
| Kazakhs2          | 53        | Xinjiang          | 12                   |
| Ket               | 38        | Northern Eurasia  | 13                   |
| Khakass           | 53        | South Siberia     | 7                    |
| Kirghiz           | 95        | South Kyrgyzstan  | 1                    |
| Koryak            | 155       | Siberia           | 11                   |
| Kurd              | 20        | Western Iran      | 10                   |
| Lur               | 17        | Southwestern Iran | 10                   |
| Mansi             | 98        | Northwest Siberia | 14                   |
| Mongolians        | 89        | Mongolia          | 6                    |
| Negedal           | 33        | Siberia           | 9                    |
| Nganasan          | 24        | Northern Eurasia  | 14                   |
| Nivkh             | 56        | Siberia           | 9                    |
| Shugnan           | 44        | Tajikistan        | 10                   |
| Sojots            | 30        | South Siberia     | 7                    |
| Tarbagatay        | 160       | East Kazakhstan   | This study           |
| Todjins           | 48        | South Siberia     | 7                    |
| Tofalars          | 58        | South Siberia     | 7                    |
| Tubalar           | 72        | Siberia           | 9                    |
| Turkmen           | 41        | Turkmenistan      | 10                   |
| Turks             | 50        | Anatolia, Turkey  | 10                   |
| Tuvinians         | 90        | South Siberia     | 7                    |
| Udegey            | 46        | Siberia           | 9                    |
| Uighurs           | 47        | Xinjiang          | 12                   |
| Ulchi             | 87        | Siberia           | 9                    |
| Uzbek             | 42        | South Uzbekistan  | 10                   |

**\*Abbreviation: n – number of individuals.**
