# Supplementary material for: Mitochondrial and Y-chromosomal profile of the Kazakh population from East Kazakhstan
Source: PubMed Central journal article supplement (PMC3583390; doi:10.3325/cmj.2013.54.17), 2013-02
Supplement: CroatMedJ_54_s004.pdf [file CroatMedJ_54_s004.pdf]

**Supplementary table 2. Characteristics of Y-chromosome studies in Eurasian populations**

| <b>Population</b>      | <b>n*</b> | <b>Location</b>       | <b>Reference No.</b> |
|------------------------|-----------|-----------------------|----------------------|
| Altaian Kazakhs1 (AK1) | 30        | South West Altai      | 15                   |
| Altaian Kazakhs2 (AK2) | 89        | South East Altai      | 15                   |
| Kalmyks (KM)           | 99        | Kalmykia, Russia      | 16                   |
| Kazakhs1 (KZ1)         | 49        | South East Kazakhstan | 17                   |
| Kazakhs2 (KZ2)         | 50        | Kara-Kalpakia         | 18                   |
| Kirghiz (KG)           | 41        | North Kyrgyzstan      | 17                   |
| Mongolians1 (MG1)      | 45        | Inner Mongolia, China | 19                   |
| Mongolians2 (MG2)      | 65        | Outer Mongolia        | 19                   |
| Tarbagatay (TG)        | 67        | East Kazakhstan       | This study           |
| Uighurs1 (UI1)         | 39        | South East Kazakhstan | 17                   |
| Uighurs2 (UI2)         | 31        | Urumqi                | 19                   |
| Uzbeks (UZ)            | 40        | Kara-Kalpakia         | 18                   |
| Kazakhs3 (KZ3)         | 99        | South Kazakhstan      | Unpublished data     |

**\*Abbreviation: n – number of individuals.**
