# Supplementary material for: Mitochondrial and Y-chromosomal profile of the Kazakh population from East Kazakhstan
Source: PubMed Central journal article supplement (PMC3583390; doi:10.3325/cmj.2013.54.17), 2013-02
Supplement: CroatMedJ_54_s005.pdf [file CroatMedJ_54_s005.pdf]

**Supplementary table 3. Haplogroup frequencies in Native American populations (29)**

|                  | <b>A</b><br>(%) | <b>B</b><br>(%) | <b>C</b><br>(%) | <b>D</b><br>(%) | <b>n</b> |
|------------------|-----------------|-----------------|-----------------|-----------------|----------|
| <b>Apache</b>    | 40.0            | 25.0            | 35.0            | 0.0             | 20       |
| <b>Arsario</b>   | 63.8            | 0.0             | 36.2            | 0.0             | 47       |
| <b>Cofan</b>     | 0.0             | 25.0            | 75.0            | 0.0             | 4        |
| <b>Catamarca</b> | 24.0            | 4.0             | 24.0            | 48.0            | 25       |
| <b>Cayapa</b>    | 25.0            | 25.0            | 25.0            | 25.0            | 32       |
| <b>Coreguaje</b> | 3.7             | 18.5            | 66.7            | 11.1            | 27       |
| <b>Dogrib</b>    | 100.0           | 0.0             | 0.0             | 0.0             | 23       |
| <b>Embera</b>    | 23.1            | 53.8            | 23.1            | 0.0             | 39       |
| <b>Ijka</b>      | 89.7            | 3.4             | 6.9             | 0.0             | 29       |
| <b>Kuna</b>      | 61.8            | 38.2            | 0.0             | 0.0             | 34       |
| <b>Kogui</b>     | 56.3            | 0.0             | 43.8            | 0.0             | 48       |
| <b>Mocovi</b>    | 80.0            | 0.0             | 0.0             | 20.0            | 5        |
| <b>Ngöbe</b>     | 63.6            | 36.4            | 0.0             | 0.0             | 77       |
| <b>N. Paiute</b> | 10.0            | 40.0            | 15.0            | 35.0            | 20       |
| <b>Salta</b>     | 22.2            | 38.9            | 27.8            | 11.1            | 18       |
| <b>Secoya</b>    | 10.0            | 20.0            | 70.0            | 0.0             | 2        |
| <b>Siona</b>     | 0.0             | 50.0            | 50.0            | 0.0             | 10       |
| <b>Zuni</b>      | 18.2            | 63.6            | 18.2            | 0.0             | 11       |
| <b>Tucuman</b>   | 33.3            | 11.1            | 55.6            | 0.0             | 9        |
| <b>Vaupés</b>    | 22.7            | 13.6            | 36.4            | 27.3            | 22       |
| <b>Waunana</b>   | 31.6            | 36.8            | 26.3            | 5.3             | 57       |
| <b>Wayuu</b>     | 38.1            | 26.2            | 35.7            | 0.0             | 42       |
